# Supplementary material for: Isolation of a Marker Olean-12-en-28-butanol Derivative from Viscum continuum E. Mey. Ex Sprague and the Evaluation of Its Antioxidant and Antimicrobial Potentials
Source: MDPI journal article supplement (doi:10.3390/plants13101382), 2024-05-16
Supplement: s1 [file s1]

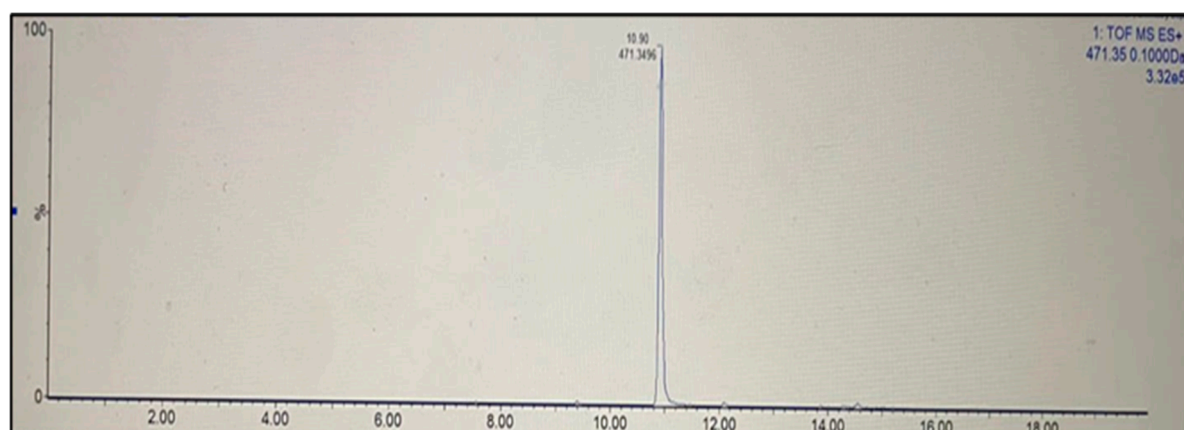

**Figure S1.** Total ion chromatogram of **D4** during analysis indicating the purity of the isolate as detected by diode array and TOF MS ESI-BPI.

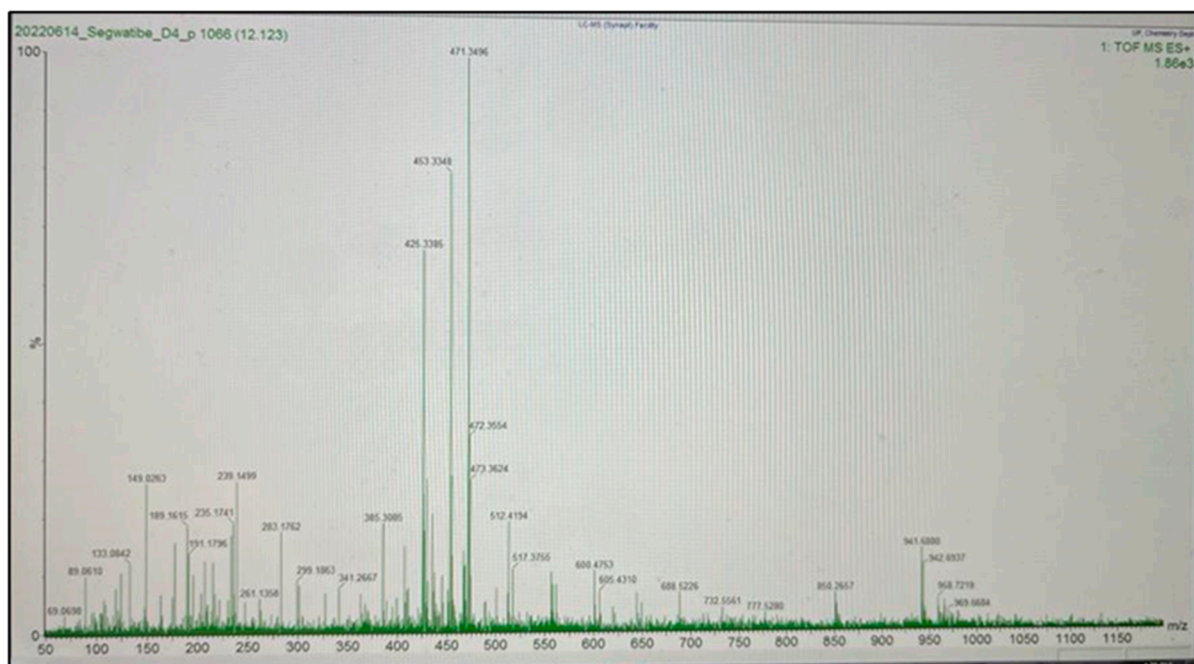

**Figure S2.** UPLC-TOF MS indicating the fragments of D4 (453, 426, 386, 283, 239, 149)

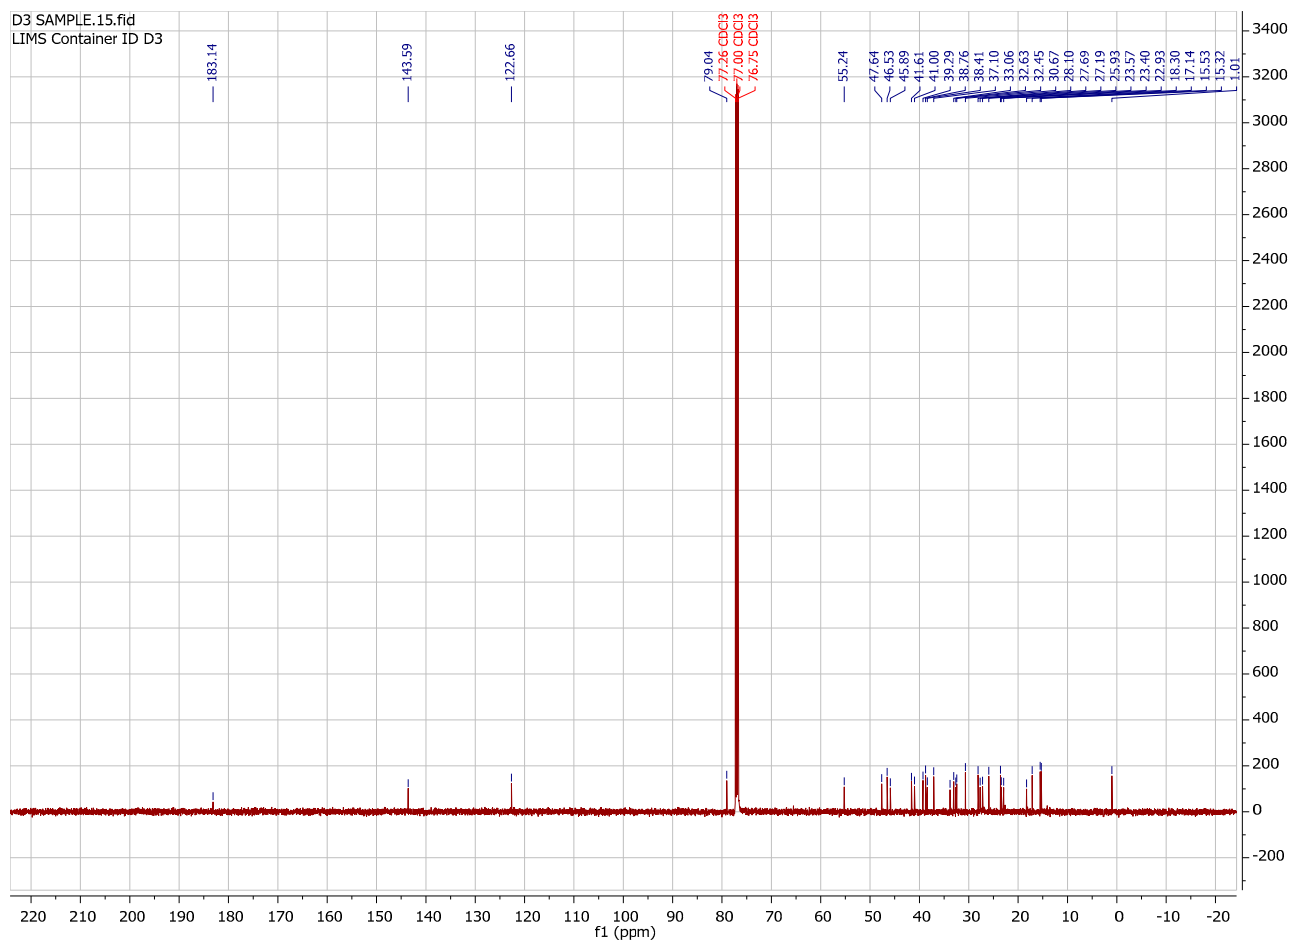

**Figure S3. C-13 NMR of D4**

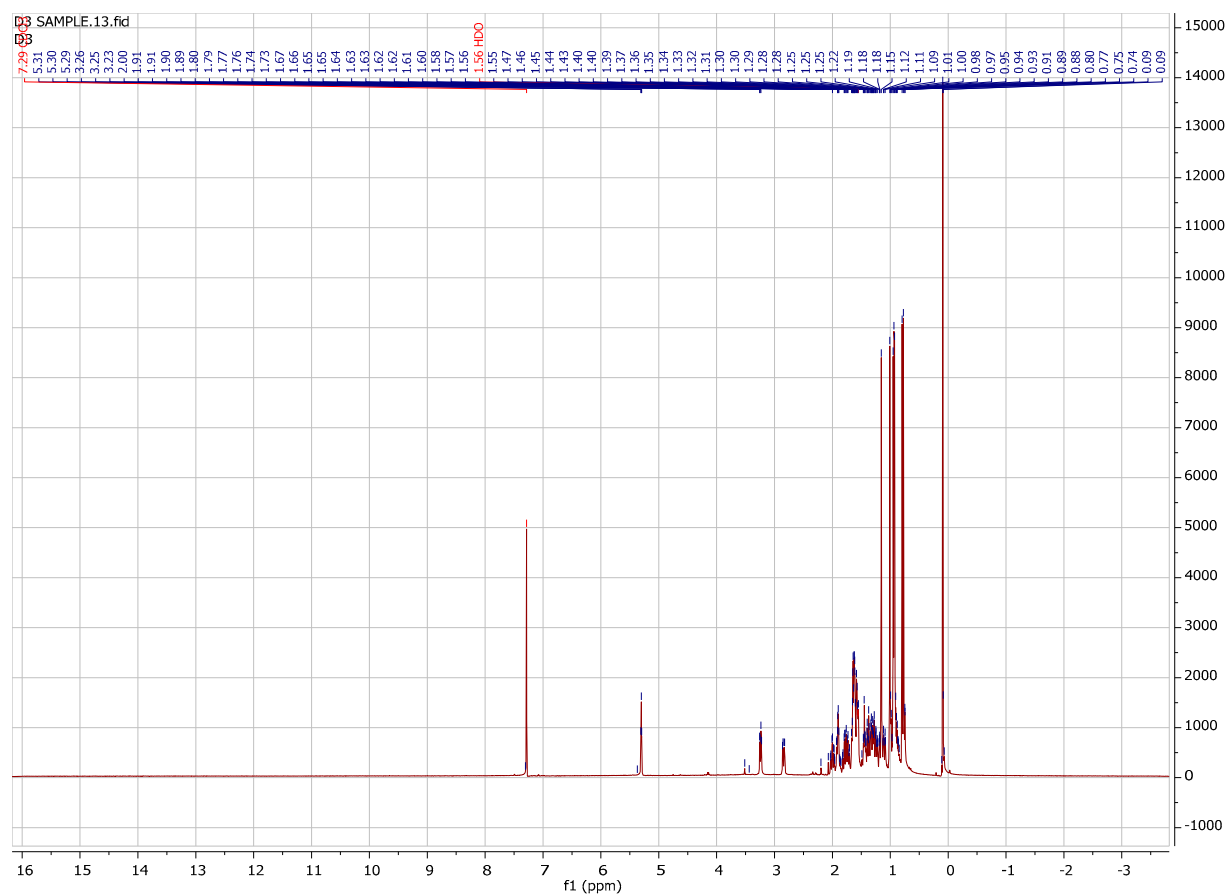

Figure S4. H-1 NMR of D4

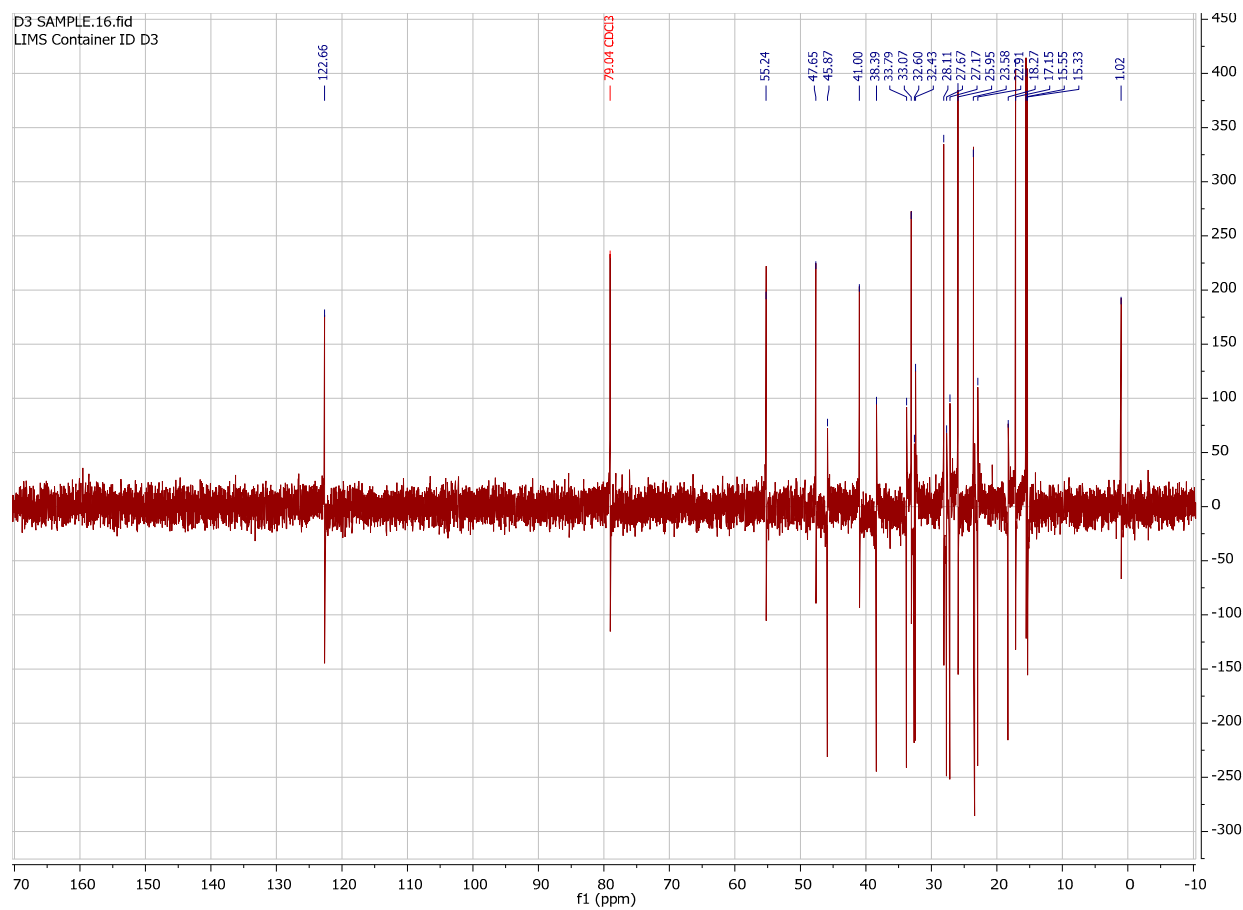

**Figure S5. DEPT NMR of D4**

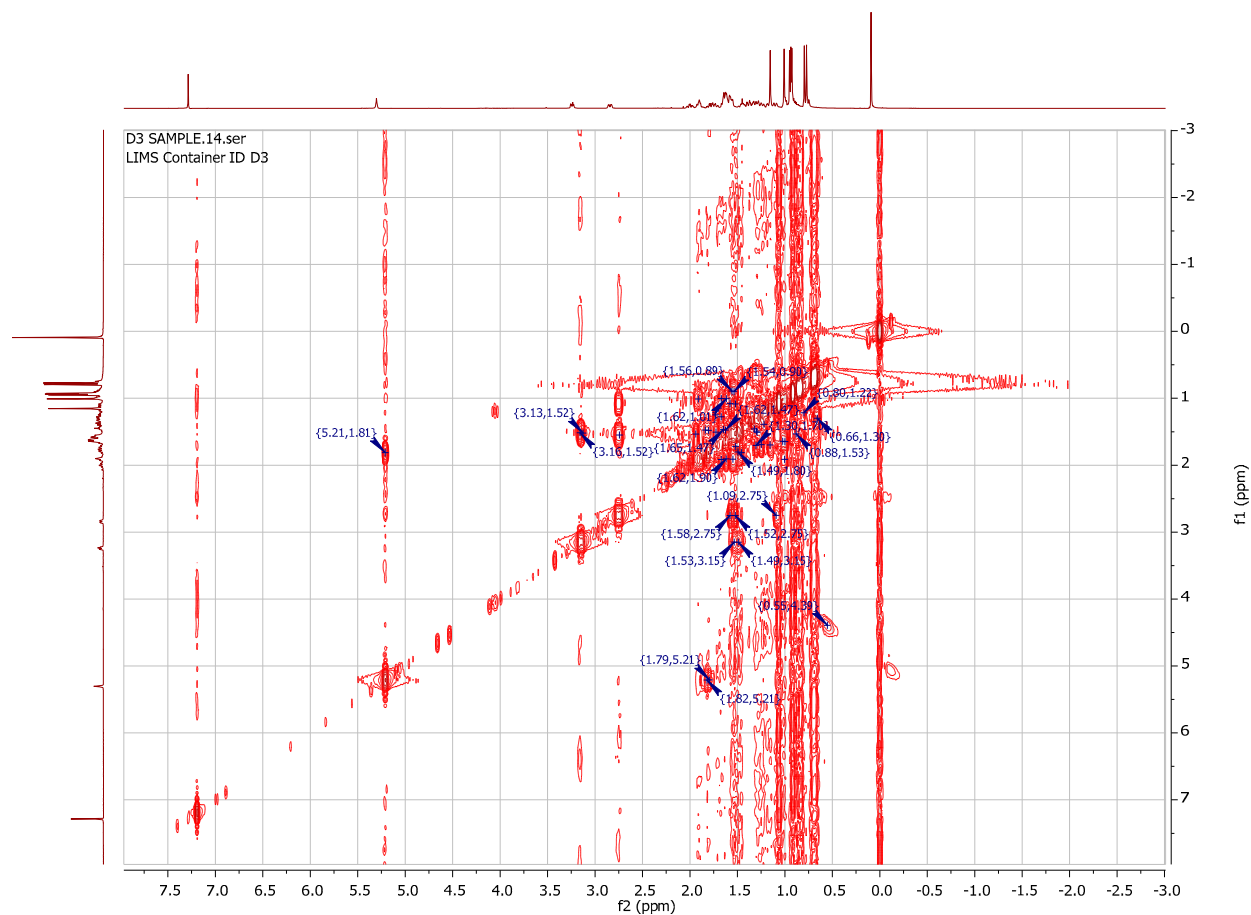

Figure S6. COSY NMR of D4

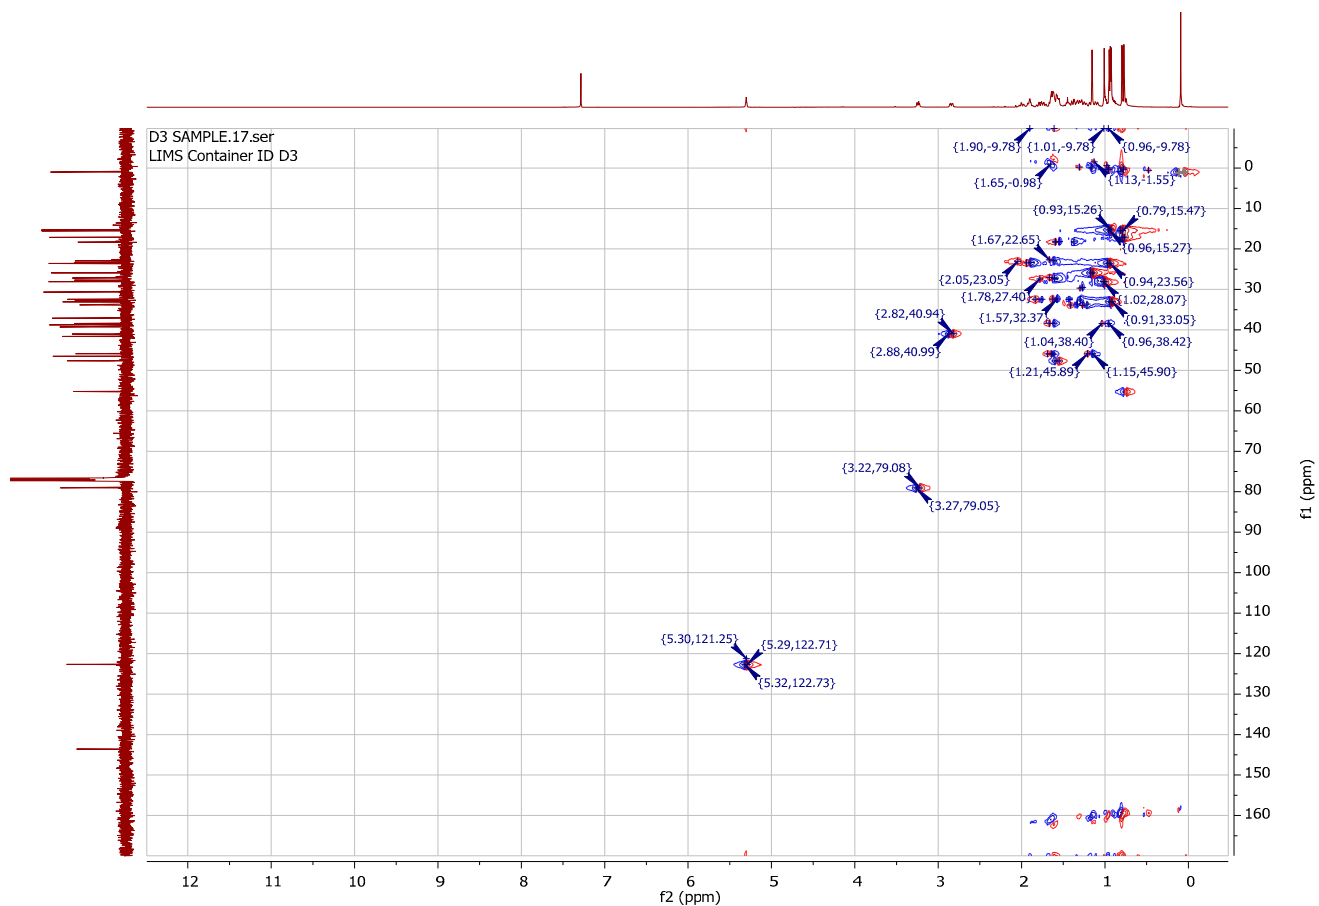

**Figure S7. HSQC NMR of D4**

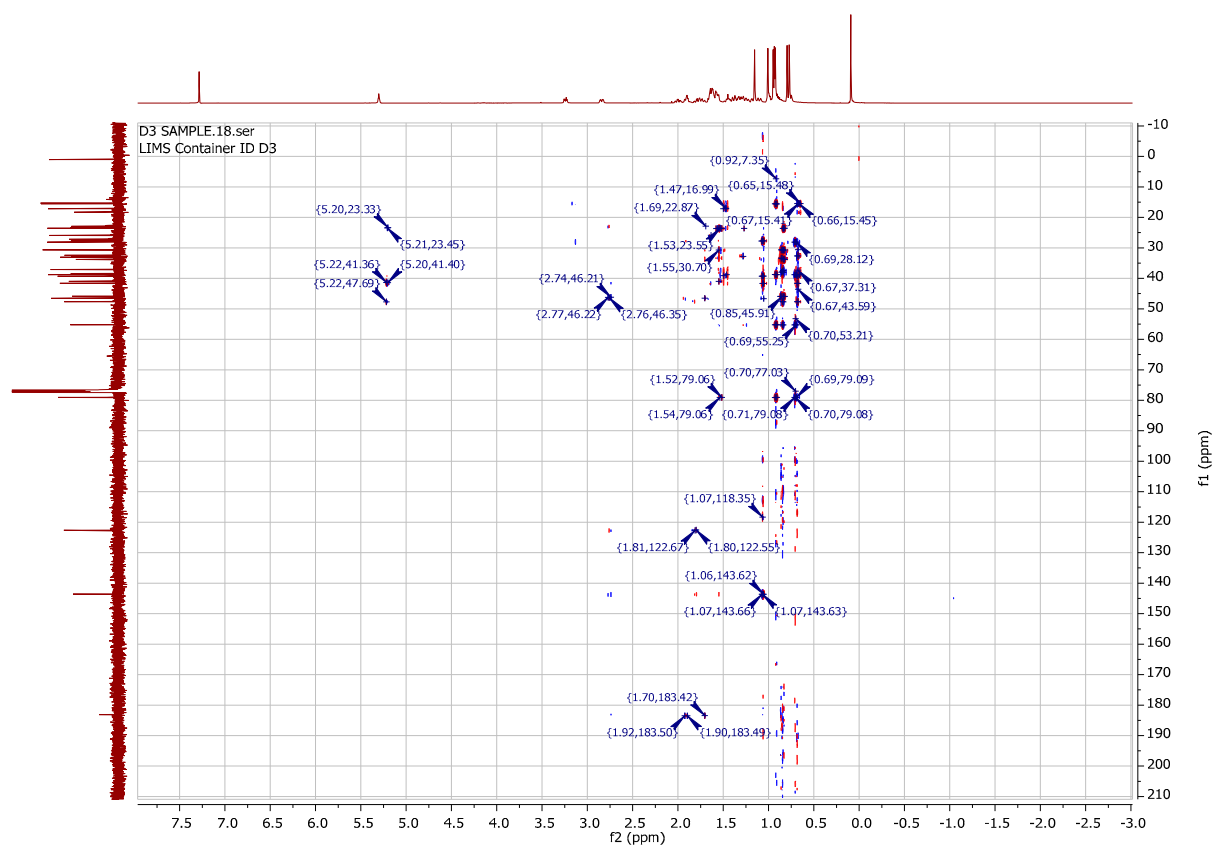

**Figure S8. HMBC NMR of D4**
